# Supplementary material for: Thermoelectric performance of ZrNX (X = Cl, Br and I) monolayers
Source: Royal Society of Chemistry journal article supplement (doi:10.1039/d1cp01928g), 2021-11-29
Supplement: d1cp01928g1.pdf [file d1cp01928g1.pdf]

## Thermoelectric Performance of ZrNX (X = Cl, Br, I) Monolayers

Wenwu Shi,<sup>1,3</sup> Nina Ge,<sup>2</sup> Xinzhong Wang,<sup>3\*</sup> Zhiguo Wang<sup>1,3\*</sup>

1. *University of Electronic Science and Technology of China, Chengdu 610054, PR China*
2. *State Key Laboratory of Environmental-friendly Energy Materials, Southwest University of Science and Technology, Mianyang, 621000, P.R. China*
3. *Department of Electronic Communication and Technology, Shenzhen Institute of Information Technology, Shenzhen 518172, China*

\*Corresponding authors. Email: [xzwang868@163.com](mailto:xzwang868@163.com) (X.W); [zgwang@uestc.edu.cn](mailto:zgwang@uestc.edu.cn) (Z.W.)

**Table S1.** The optimized lattice constants (Å) and band gap (eV) of ZrNX monolayers calculated by the PBE functional with and without spin-orbit coupling (SOC). The relaxation condition of the maximum force on each atom is less than 0.01 eV/Å and 0.001 eV/Å were also tested.

|       |                      | <i>a</i> | <i>b</i> | <i>E<sub>g</sub></i> |
|-------|----------------------|----------|----------|----------------------|
| ZrNCl | 0.01 eV/ Å, PAW      | 3.560    | 4.170    | 1.75                 |
|       | 0.001 eV/ Å, PAW     | 3.562    | 4.179    | 1.74                 |
|       | 0.001 eV/ Å, PAW+SOC | 3.562    | 4.179    | 1.73                 |
| ZrNBr | 0.01 eV/ Å, PAW      | 3.635    | 4.164    | 1.72                 |
|       | 0.001 eV/ Å, PAW     | 3.639    | 4.168    | 1.71                 |
|       | 0.001 eV/ Å, PAW+SOC | 3.639    | 4.168    | 1.70                 |
| ZrNI  | 0.01 eV/ Å, PAW      | 3.760    | 4.160    | 1.28                 |
|       | 0.001 eV/ Å, PAW     | 3.774    | 4.165    | 1.28                 |
|       | 0.001 eV/ Å, PAW+SOC | 3.774    | 4.165    | 1.16                 |

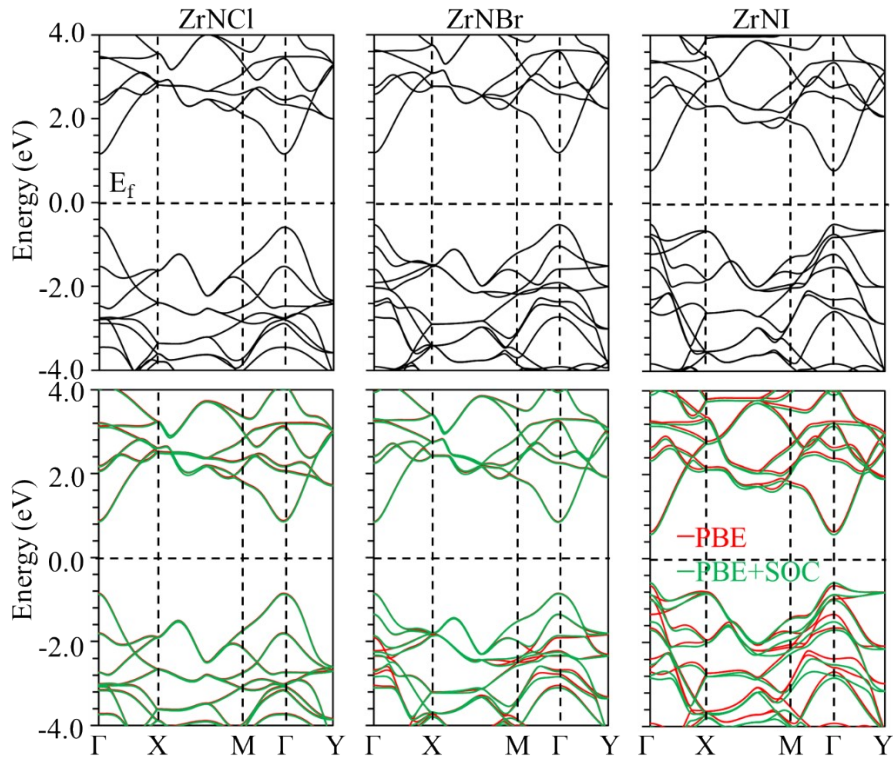

**FIG. S1** Electronic band structures of ZrNX monolayers calculated by the PBE functional with spin-orbit coupling (SOC) (green lines) and without SOC (red lines). The Fermi energy level is set to zero. The SOC effect is negligibly affected the band structures of ZrNCl and ZrNBr monolayers. And the shape of the bands structure is not affected by the SOC effect in ZrNI monolayer, except for the 0.12 eV decreasing of the band gap. The top and bottom parts of figure are calculated with relaxation condition of the maximum force on each atom is less than 0.01 eV/Å and 0.001 eV/Å, respectively.

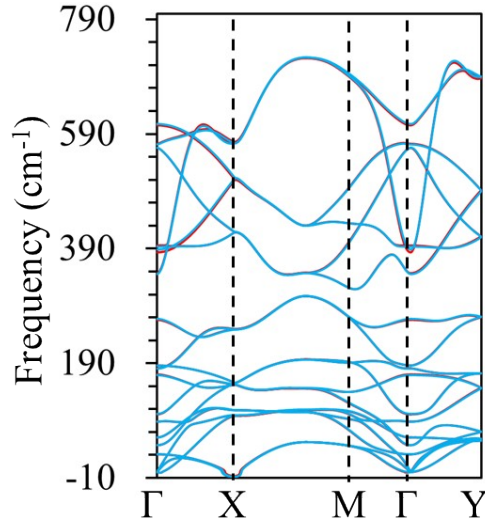

**FIG. S2** Phonon dispersion structure of ZrNI monolayers along the highly symmetric k-point path in the first Brillouin zone (with VASP). The blue and red lines are calculated with relaxation condition of the maximum force on each atom is less than  $0.01 \text{ eV/\AA}$  and  $0.001 \text{ eV/\AA}$ , respectively.

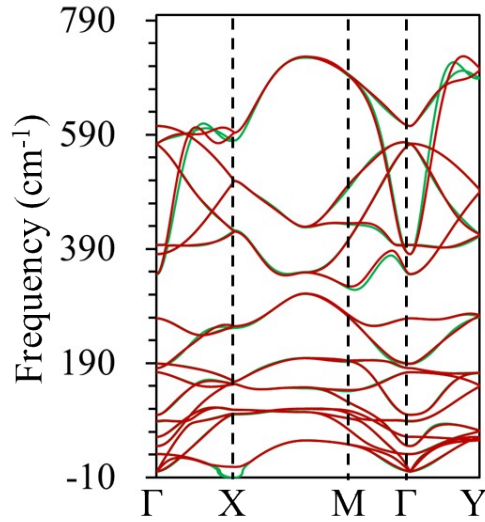

**FIG. S3** Phonon dispersion structure of ZrNI monolayers along the highly symmetric k-point path in the first Brillouin zone (with PWmat). The green and red lines are calculated with a  $5 \times 5 \times 1$  supercell and a  $6 \times 5 \times 1$  supercell, respectively.

All the crystal structure and phonon spectrum calculations based on first principles, implemented in the PWmat package using GPU.<sup>1</sup> The Norm-Conserving Pseudopotential was used to describe the core-ion interactions, the generalized gradient approximations (GGA) of

the Perdew-Burke-Ernzerhof (PBE) functional is adopted for the exchange-correlation.<sup>2,3</sup> A 70 Ry cutoff energy was used for the plane wave basis, and a 15 Å vacuum was adopted to avoid the fake interactions between the adjacent layers.

## References

1. W. Jia, Z. Cao, L. Wang, J. Fu, X. Chi, W. Gao and L. W. Wang, *Compu. Phys. Commun.*, 2013, **184**, 9-18.
2. J. P. Perdew, K. Burke and M. Ernzerhof, *Phys. Rev. Lett.*, 1996, **77**, 3865-3868.
3. P. Ziesche, S. Kurth and J. P. Perdew, *Comput. Mater. Sci.*, 1998, **11**, 122-127.
